# Supplementary material for: Flexible h-BN foam sheets for multifunctional electronic packaging materials with ultrahigh thermostability
Source: Royal Society of Chemistry journal article supplement (doi:10.1039/c8sm00521d), 2018-01-01
Supplement: c8sm00521d1.pdf [file c8sm00521d1.pdf]

## Supporting Information

### **Flexible h-BN Foam Sheets for Multifunctional Electronic Packaging Materials with Ultrahigh Thermostability**

Deul Kim<sup>1</sup>, Artavazd Kirakosyan<sup>1</sup>, Jae Woong Lee<sup>1</sup>, Jong-Ryul Jeong<sup>1</sup>, and Jihoon Choi<sup>1,\*</sup>

Department of Materials Science and Engineering, Chungnam National University

99 Daehak-ro, Yuseong-gu, Daejeon, 34134, Republic of Korea

Corresponding author: Email: [jihoonc@cnu.ac.kr](mailto:jihoonc@cnu.ac.kr)

Phone: +82 42 821 6632; Fax +82 42 821 5850

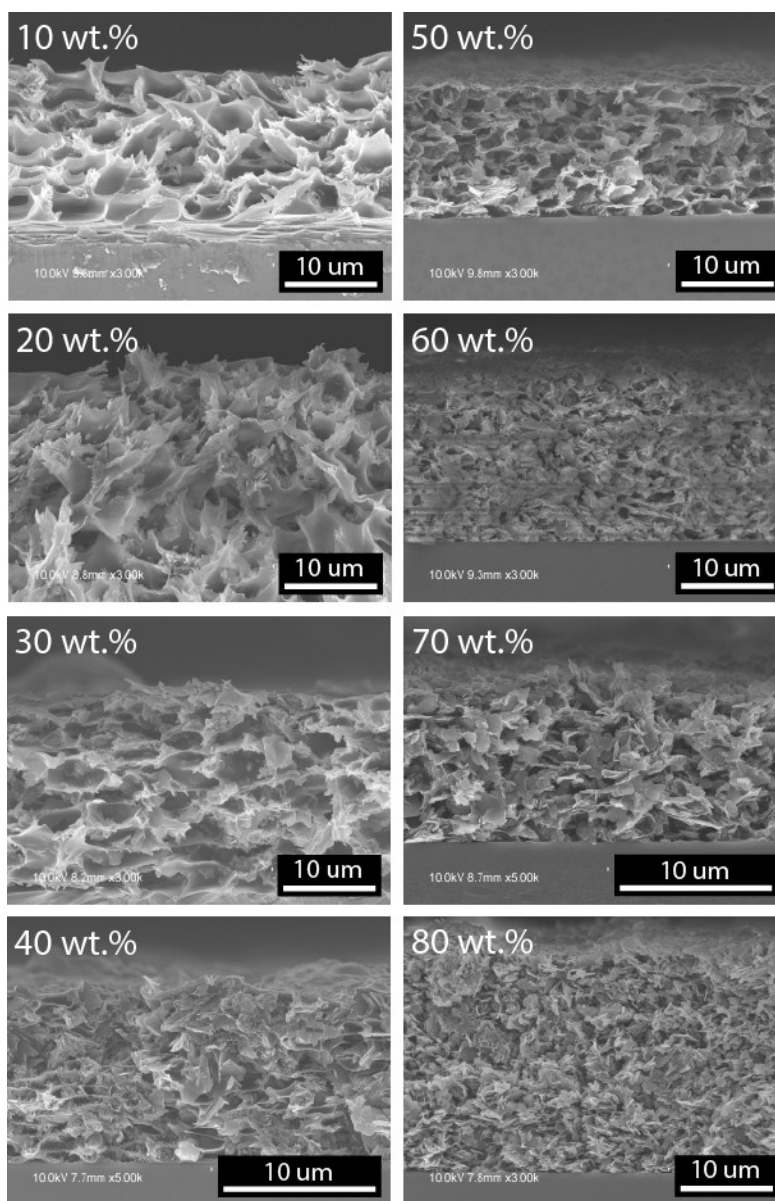

**Fig S1.** Scanning electron micrographs of *as-cast* h-BN foam sheets with a variety of h-BN contents (10 – 80 wt.%).

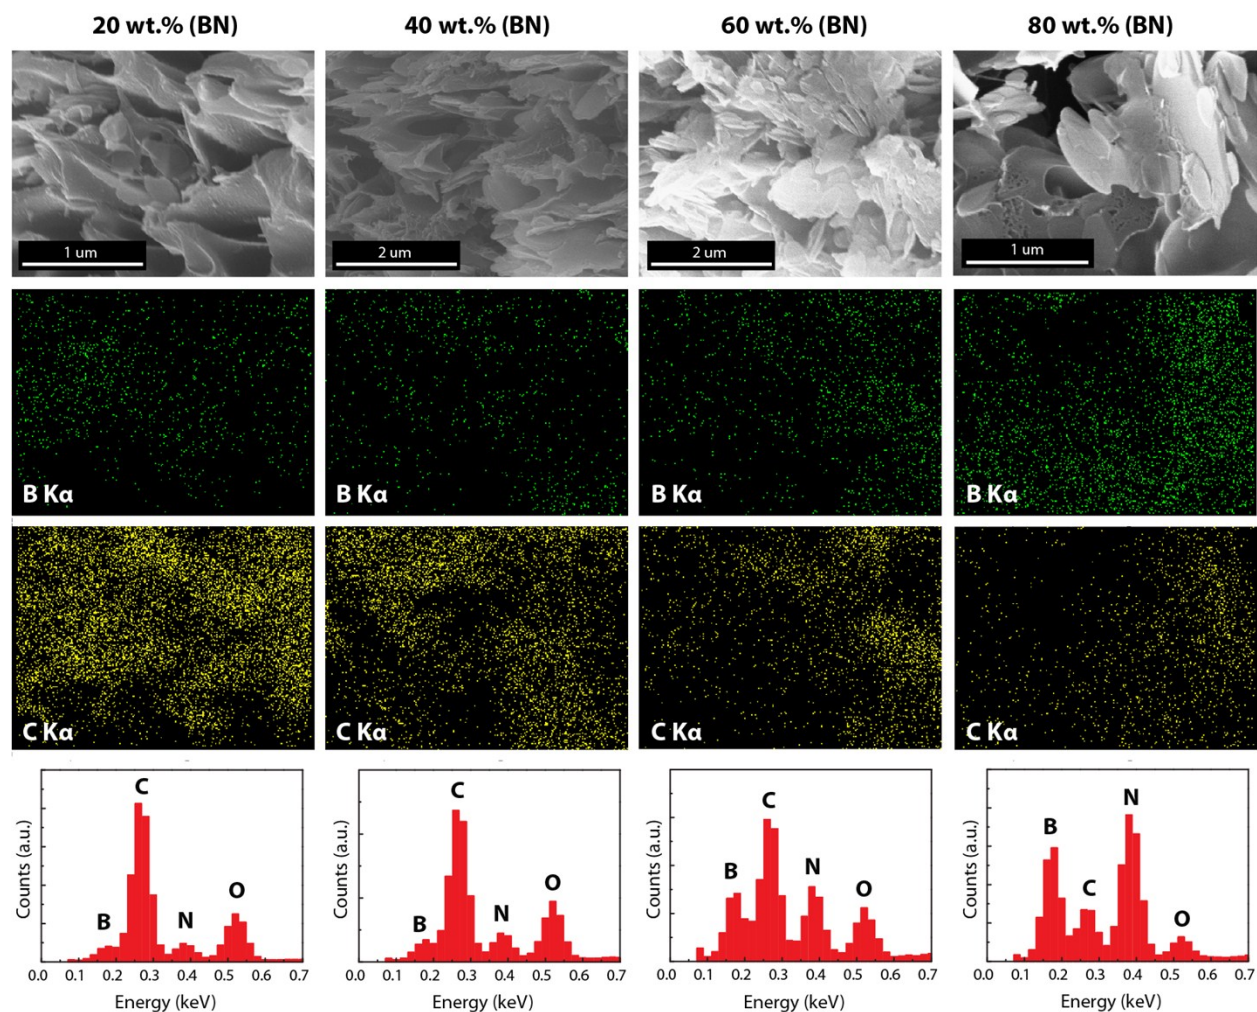

**Fig S2.** Magnified SEM images of *as-cast* h-BN foam sheets (20 – 80 wt.%) and the corresponding EDS spectra and elemental mapping of boron and carbon.

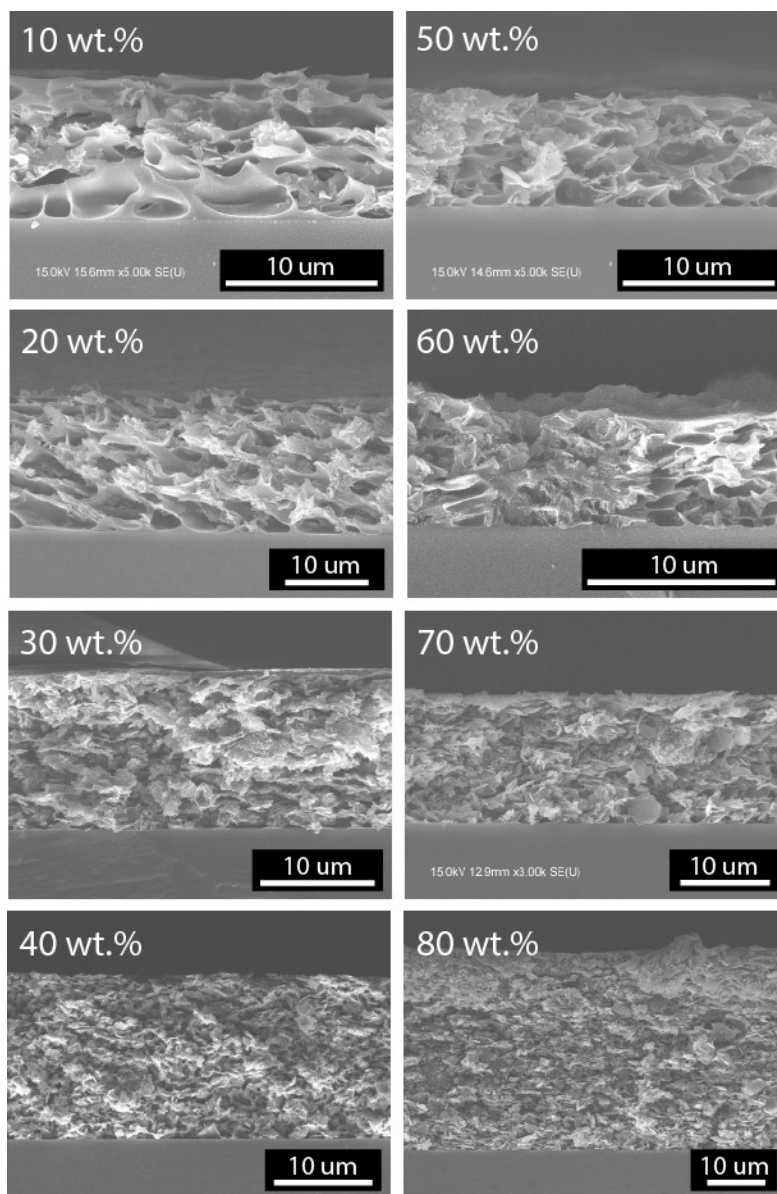

**Fig S3.** Scanning electron micrographs of *roll-milled* h-BN foam sheets with a variety of h-BN contents from 10 wt.% to 80 wt.%.

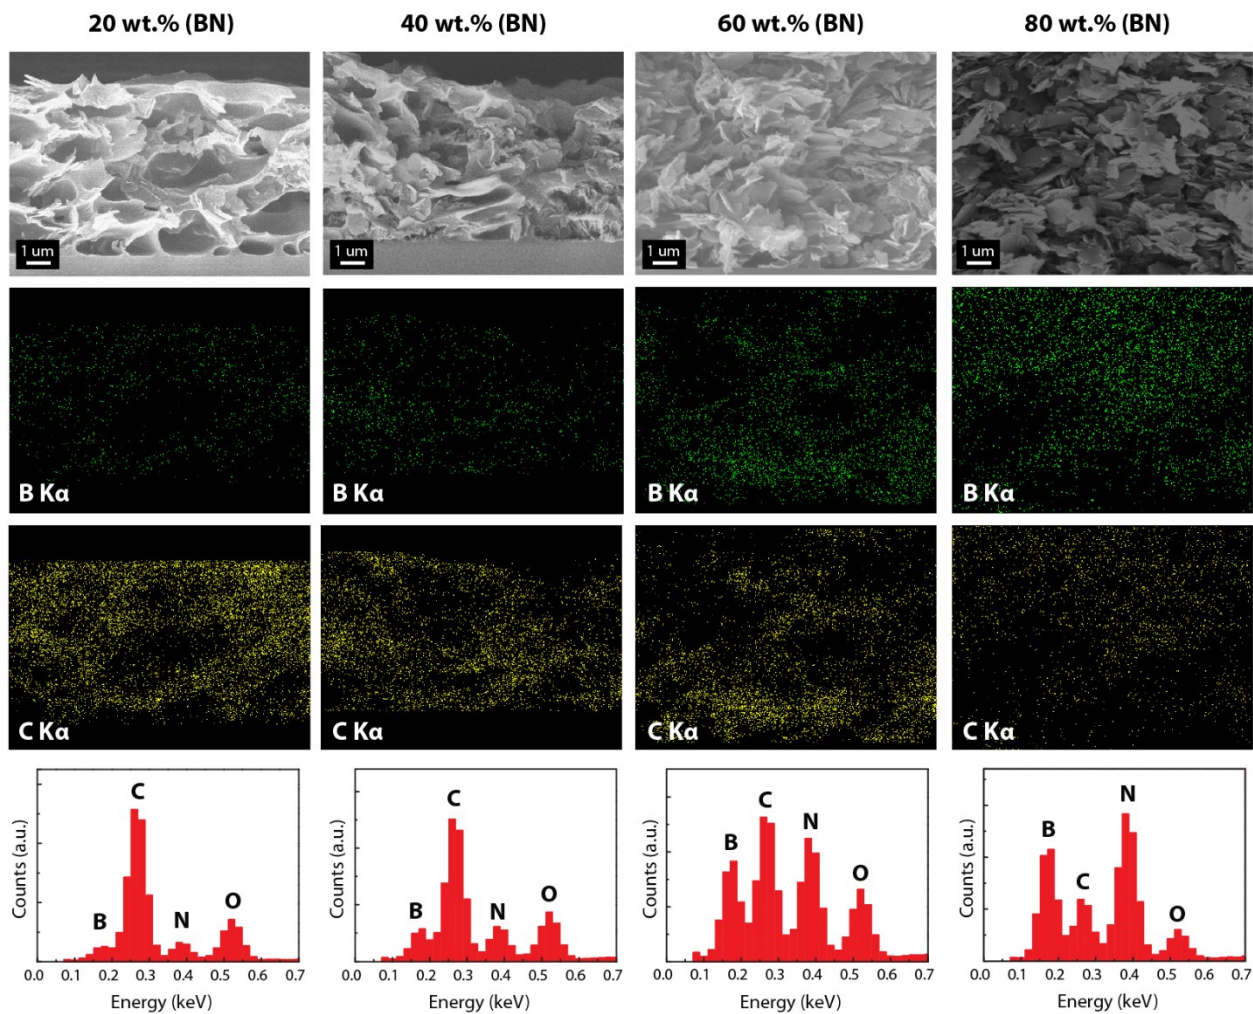

**Fig S4.** Magnified SEM images of *roll-milled* h-BN foam sheets (20 – 80 wt.%) and the corresponding EDS spectra and elemental mapping of boron and carbon.

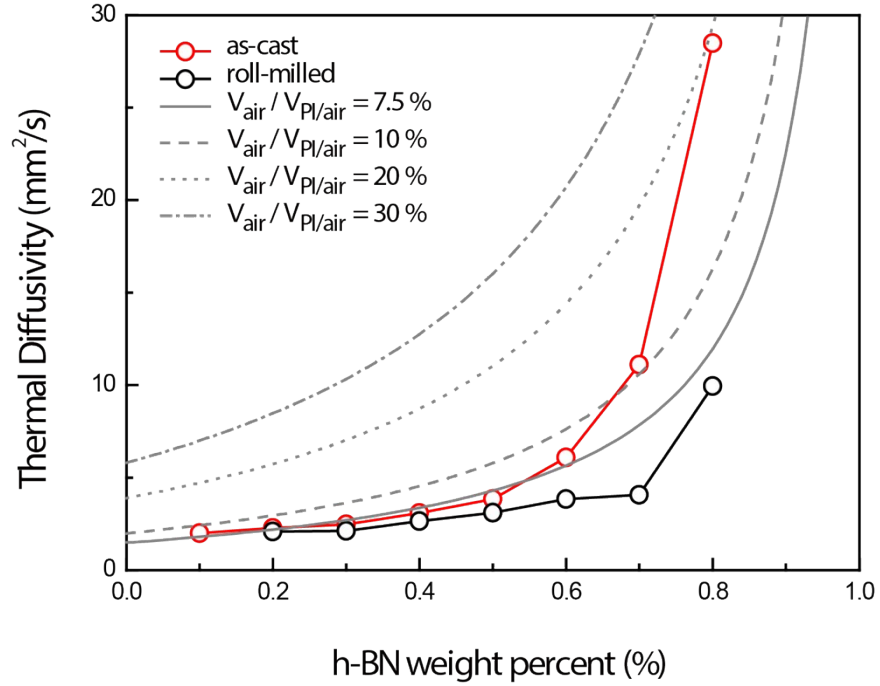

**Fig S5.** Thermal diffusivity of *as-cast* (red circles) and of *roll-milled* (black circles) h-BN foam sheets as a function of h-BN contents. Gray lines represent the theoretical thermal diffusivity of the h-BN foam sheets using Hatta and Taya model ( $\alpha_{\text{h-BN}} = 180$ ,  $\alpha_{\text{PI/air}} = 1.5 \text{ mm}^2/\text{s}$ ,  $S = 0.5$ ) with different volume fraction of pores (i.e. air).<sup>25</sup>

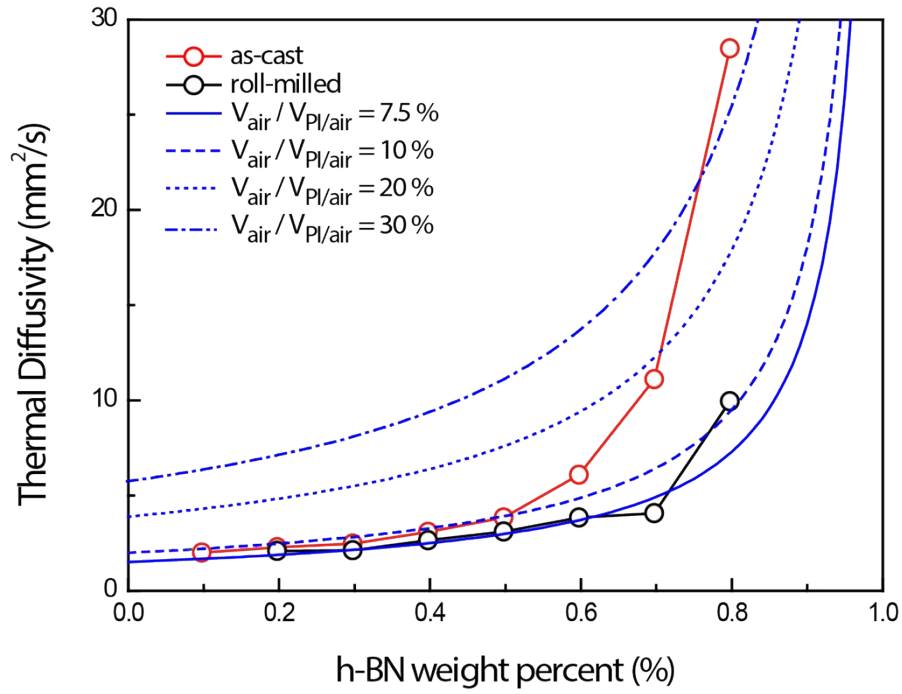

**Fig S6.** Thermal diffusivity of *as-cast* (red circles) and of *roll-milled* (black circles) h-BN foam sheets as a function of h-BN contents. Blue lines represent the theoretical thermal diffusivity of the h-BN foam sheets using Hatta and Taya model ( $\alpha_{\text{h-BN}} = 180$ ,  $\alpha_{\text{PI/air}} = 1.5 \text{ mm}^2/\text{s}$ ,  $S = 1$ ) with different volume fraction of pores (i.e. air).<sup>25</sup>

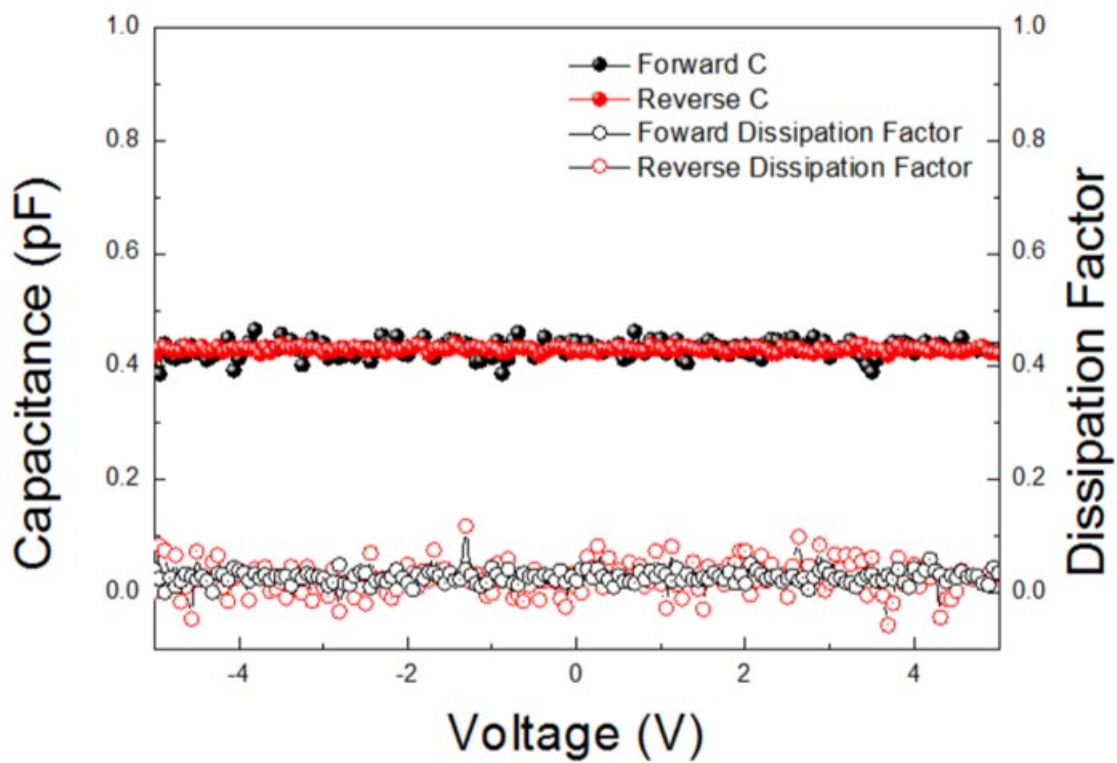

**Fig S7.** Capacitance (left) and dissipation factor (right) as a function of voltage of h-BN foam sheet (80 wt.%).
